# Supplementary material for: Peptide/β-Peptoid Hybrids with Activity against Vancomycin-Resistant Enterococci: Influence of Hydrophobicity and Structural Features on Antibacterial and Hemolytic Properties
Source: MDPI journal article supplement (doi:10.3390/ijms22115617), 2021-05-25
Supplement: s1 [file s1]

## Supporting information

### Peptide/ $\beta$ -peptoid hybrids with activity against vancomycin-resistant enterococci: Influence of hydrophobicity and structural features on antibacterial and hemolytic properties

Martin Vestergaard<sup>1</sup>, Bolette Skive <sup>1</sup>, Ilona Domraceva,<sup>3</sup> Hanne Ingmer<sup>1</sup> & Henrik Franzyk<sup>2\*</sup>

1. Department of Veterinary and Animal Sciences, Faculty of Health and Medical Sciences, University of Copenhagen, Stigbøjlen 4, DK-1870 Frederiksberg C, Denmark.
2. Department of Drug Design and Pharmacology, Faculty of Health and Medical Sciences, University of Copenhagen, DK-2100 Copenhagen, Denmark.
3. Latvian Institute of Organic Synthesis, Aizkraukles 21, 1006, Riga, Latvia

**Supplementary Table S1.** Screening of 20 peptidomimetics against Enterococci.

Initial screening of peptidomimetics at a single concentration (32 µg/ml) against multiple *E. faecium* and *E. faecalis* strains. Compounds marked in blue were selected for further studies.

| Inhibition at 48 h |                                                                 | Growth after 48 h |      | Growth after 24 h |      |                    |       |       |
|--------------------|-----------------------------------------------------------------|-------------------|------|-------------------|------|--------------------|-------|-------|
|                    |                                                                 |                   |      |                   |      |                    |       |       |
|                    |                                                                 | <i>E. faecium</i> |      |                   |      | <i>E. faecalis</i> |       |       |
| No.                | Sequence                                                        | ATCC<br>19434     | 3978 | 2961              | 1798 | ATCC<br>29212      | 37216 | 38262 |
| 1                  | Ac-[hArg-βNPhe] <sub>8</sub> -NH <sub>2</sub>                   |                   |      |                   |      |                    |       |       |
|                    | Ac-[hArg-βNspe] <sub>6</sub> -NH <sub>2</sub>                   |                   |      |                   |      |                    |       |       |
| 2                  | Ac-[hArg-βNsce] <sub>6</sub> -NH <sub>2</sub>                   |                   |      |                   |      |                    |       |       |
| 3                  | SpermineAc-[hArg-βNspe-Lys-βNspe] <sub>3</sub> -NH <sub>2</sub> |                   |      |                   |      |                    |       |       |
|                    | NDab-[hArg-βNspe-Lys-βNspe] <sub>3</sub> -NH <sub>2</sub>       |                   |      |                   |      |                    |       |       |
|                    | TODA-[hArg-βNspe-Lys-βNspe] <sub>3</sub> -NH <sub>2</sub>       |                   |      |                   |      |                    |       |       |
| 4                  | H-[hArg-βNspe-Lys-βNspe] <sub>4</sub> -NH <sub>2</sub>          |                   |      |                   |      |                    |       |       |
|                    | Ac-[hArg-Nspe-Lys-Nspe] <sub>3</sub> -NH <sub>2</sub>           |                   |      |                   |      |                    |       |       |
| 5                  | Ac-[hArg-βNsce-Lys-βNspe] <sub>3</sub> -NH <sub>2</sub>         |                   |      |                   |      |                    |       |       |
| 6                  | Cinn-[hArg-βNspe-Lys-βNspe] <sub>3</sub> -NH <sub>2</sub>       |                   |      |                   |      |                    |       |       |
|                    | H-(NLys-Phe) <sub>8</sub> -NH <sub>2</sub>                      |                   |      |                   |      |                    |       |       |
|                    | SpermineAc-(Lys-βNPhe) <sub>6</sub>                             |                   |      |                   |      |                    |       |       |
|                    | Ac-(Lys-βNspe) <sub>8</sub> -NH <sub>2</sub>                    |                   |      |                   |      |                    |       |       |
| 7                  | H-[Lys-βNPhe(F)] <sub>8</sub> -NH <sub>2</sub>                  |                   |      |                   |      |                    |       |       |
| 8                  | H-[Lys-βNPhe(F <sub>3</sub> )] <sub>6</sub> -NH <sub>2</sub>    |                   |      |                   |      |                    |       |       |
| 9                  | H-[Lys-βNCha] <sub>8</sub> -NH <sub>2</sub>                     |                   |      |                   |      |                    |       |       |
| 10                 | Oct-[Lys-βNspe] <sub>6</sub> -NH <sub>2</sub>                   |                   |      |                   |      |                    |       |       |
| 11                 | Lau-[Lys-βNPhe] <sub>6</sub> -NH <sub>2</sub>                   |                   |      |                   |      |                    |       |       |
|                    | Ac-[NLys-Trp] <sub>8</sub> -NH <sub>2</sub>                     |                   |      |                   |      |                    |       |       |
|                    | Ac-[βNLys-Trp] <sub>8</sub> -NH <sub>2</sub>                    |                   |      |                   |      |                    |       |       |

Abbreviations: Ac = acetyl; Cinn = cinnamoyl; hArg=homoarginine; Lau = lauroyl; βNCha = N-cyclohexylmethyl-β-alanine; NLys = N-(4-aminobutyl)-glycine; βNLys = N-(4-aminobutyl)-β-alanine; βNPhe = N-benzyl-β-alanine; βNPhe(F) = N-(4-fluorobenzyl)-β-alanine; βNPhe(F<sub>3</sub>) = N-(3,4,5-trifluorobenzyl)-β-alanine; βNsce=N-(S)-1-cyclohexylethyl-β-alanine; βNspe=N-(S)-1-phenylethyl-β-alanine; Oct = octanoyl; SpermineAc = H<sub>2</sub>N(CH<sub>2</sub>)<sub>3</sub>NH(CH<sub>2</sub>)<sub>4</sub>NH(CH<sub>2</sub>)<sub>3</sub>NHCH<sub>2</sub>(C=O)-; TODA = H<sub>3</sub>CO(CH<sub>2</sub>)<sub>2</sub>O(CH<sub>2</sub>)<sub>2</sub>OCH<sub>2</sub>(C=O)-.

**Supplementary Table S2.** Drug combinations of peptidomimetics with conventional antibiotics.  
N.D.: Not determined

| Antibiotic    | Peptidomimetic<br>(+/- 0.5x MIC) | MIC µg/ml         |                    |                   |                   |
|---------------|----------------------------------|-------------------|--------------------|-------------------|-------------------|
|               |                                  | <i>E. faecium</i> | <i>E. faecalis</i> | <i>E. faecium</i> | <i>E. faecium</i> |
|               |                                  | ATCC 19434        | ATCC 29212         | 2961              | 1798              |
| Vancomycin    | -                                | 1-2               | 2-4                | >256              | >256              |
|               | + 2                              | 2                 | 4                  | >256              | >256              |
|               | + 5                              | 2                 | 4                  | >256              | >256              |
|               | + 10                             | 2                 | 2                  | >256              | >256              |
| Gentamicin    | -                                | 64                | 16                 | N.D.              | N.D.              |
|               | + 2                              | 64                | 16                 | N.D.              | N.D.              |
|               | + 5                              | 32                | 16                 | N.D.              | N.D.              |
|               | + 10                             | 64                | 16                 | N.D.              | N.D.              |
| Ciprofloxacin | -                                | 4-8               | 0.5-1              | N.D.              | N.D.              |
|               | + 2                              | 4-8               | 1                  | N.D.              | N.D.              |
|               | + 5                              | 4-8               | 0.5-1              | N.D.              | N.D.              |
|               | + 10                             | 4-8               | 0.5-1              | N.D.              | N.D.              |
| Linezolid     | -                                | 2                 | 2                  | N.D.              | N.D.              |
|               | + 2                              | 2                 | 2                  | N.D.              | N.D.              |
|               | + 5                              | 2                 | 2                  | N.D.              | N.D.              |
|               | + 10                             | 2                 | 2                  | N.D.              | N.D.              |
| Rifampicin    | -                                | 8                 | 1                  | N.D.              | N.D.              |
|               | + 2                              | 8                 | 1                  | N.D.              | N.D.              |
|               | + 5                              | 8                 | 1                  | N.D.              | N.D.              |
|               | + 10                             | 1-2               | 0.5-1              | N.D.              | N.D.              |
| Azithromycin  | -                                | 4-8               | 1-2                | N.D.              | N.D.              |
|               | + 2                              | 4-8               | 1                  | N.D.              | N.D.              |
|               | + 5                              | 4-8               | 1-2                | N.D.              | N.D.              |
|               | + 10                             | 4-8               | 1-2                | N.D.              | N.D.              |

**Supplementary Table S3.** Minimum bactericidal concentration for three selected peptidomimetics.

| Compound  | MV388 (µg/ml) | MV269 (µg/ml) |
|-----------|---------------|---------------|
| <b>2</b>  | 4-8           | 8             |
| <b>5</b>  | 128           | 16            |
| <b>10</b> | 16            | 32            |

**Supplementary Table S4.** Strains used in this study.

| Identity no. | Strain name                   | Source                 |
|--------------|-------------------------------|------------------------|
| MV270        | <i>E. faecium</i> D344R       | [1]                    |
| MV388        | <i>E. faecium</i> ATCC 19434  | ATCC                   |
| MV389        | <i>E. faecium</i> 3978        | Human clinical isolate |
| MV390        | <i>E. faecium</i> 2961        | Human clinical isolate |
| MV391        | <i>E. faecium</i> 1798        | Human clinical isolate |
| MV269        | <i>E. faecalis</i> ATCC 29212 | ATCC                   |
| MV392        | <i>E. faecalis</i> 37216      | Veterinary isolate     |
| MV393        | <i>E. faecalis</i> 38262      | Veterinary isolate     |
| MV394        | <i>E. faecalis</i> 39002      | Veterinary isolate     |

**Reference:**

1. Williamson, R.; Le Bouguénec, C.; Gutmann, L.; Horaud, T. One or two low affinity penicillin-binding proteins may be responsible for the range of susceptibility of *Enterococcus faecium* to benzylpenicillin. *Microbiology* **1985**, *131*, 1933-1940, doi:10.1099/00221287-131-8-1933.
